# Supplementary material
Source: HighWire-hosted journal article supplement (https://bmjopen.bmj.com/content/9/5/e025744)
Supplement: inline-supplementary-material-1 [file inline-supplementary-material-1.pdf]

## **Supplementary material**

### **Institutions that obtained the IRB approval (reference number)**

- Centro de Educación Médica e Investigaciones Clínicas (CEMIC), Buenos Aires, Argentina (nº 1139).
- Hacettepe University School of Medicine, Ankara, Turkey (nº GO 18/219-37).
- American University of Beirut Medical Center, Beirut, Lebanon (nº BIO-2018-0241)
- IRCCS San Raffaele Scientific Institute, Milan, Italy (nº 78/2018).
- Hospital Federal Servidores do Estado, Ministério da Saúde and Instituto Oswaldo Cruz, Fundação Oswaldo Cruz, Rio de Janeiro, Brazil (nº 2.740.186).
- University of Freiburg Medical Center and Faculty of Medicine, Freiburg, Germany (nº 52/17).
- Hospital del Mar, Infectious Pathology and Antimicrobials Research Group (IPAR), Institut Hospital del Mar d' Investigacions Mèdiques (IMIM), Universitat Autònoma de Barcelona (UAB), CEXS-Universitat Pompeu Fabra, Barcelona, Spain (nº 2018/7870/I).
- Instituto do Câncer do Estado de São Paulo, Faculty of Medicine, University of São Paulo, Brazil (nº NP 1304/18).
- Istanbul Education and Research Hospital, Istanbul, Turkey (nº 1195).
- Comenius University and National Cancer Institute, Bratislava, Slovakia (nº 2018-1100).
- Hospital Regional de Málaga, Málaga, Spain (nº 03/2019-EO1).

-University of Udine and Azienda Sanitaria Universitaria Integrata, Udine, Italy (nº 445/2018).

**In the following centers, the IRB approval was not necessary due to the retrospective, observational, non-intervention, and anonymised design of the study:**

-University Hospitals Plymouth NHS Trust, United Kingdom.

-Instituto de Investigación Hospital “12 de Octubre” (i+12), “12 de Octubre” University Hospital, School of Medicine, Universidad Complutense, Madrid, Spain.

-Navarra University Clinic, Pamplona, Spain.

-Clínica Maraya, Pereira Colombia.

-Hospital Erasto Gaertner, Curitiba, Brazil.

-Marqués de Valdecilla University Hospital, Santander, Spain.

-Hospital Clínic i Provincial, Barcelona, Spain.

-University of Genoa (DISSAL) and Ospedale Policlinico San Martino, Genoa, Italy.

-Ege University Faculty of Medicine, Izmir Turkey.

-Parc Taulí University Hospital, Sabadell, Barcelona, Spain.

-University of Health Science Izmir Bozyaka Training and Research Hospital, Turkey.

-Cruces University Hospital, Bilbao, Spain.

-Ramon y Cajal Hospital, Madrid, Spain.

-Klinikum Ernst von Bergmann, Academic Teaching Hospital of Charité University Medical School, Berlin, Germany.

-Instituto de Ciencias e Innovación en Medicina. Facultad de Medicina Clínica Alemana Universidad del Desarrollo, Santiago de Chile, Chile.

-Hospital Rawson, San Juan, Argentina.

-Son Espases University Hospital, Palma de Mallorca, Spain.

-Lausanne University Hospital, (CHUV), Lausanne, Switzerland.

**In the following Spanish centers the IRB approval was not necessary because they belong to a Spanish network of multicentre studies in which it is only necessary to get the approval from one of the participating centres in order to be able to participate.**

- Reina Sofía University Hospital-IMIBIC-UCO, Córdoba.

- Hospital Universitario Virgen Macarena, Sevilla, Spain.

-Vall d'Hebron University Hospital, Barcelona, Spain.
